# Supplementary material for: A Broad Role for Cysteines in Bovine Antibody Diversity
Source: PubMed Central journal article supplement (PMC7366855; doi:10.4049/immunohorizons.1900058), 2019-10-16
Supplement: NIHMS1605657-supplement-SupplementalInfo.pdf [file NIHMS1605657-supplement-SupplementalInfo.pdf]

**IGLV2** QAVLTQPSSVSGSLGQRVSIITCSGSSNNIGSYGVGWYQQVPGSGLRTIIYGSSSRPSGVPDRFSGSKSGNTATLTISSLQAEDEADYFCATVDYSSSTV  
**IGLV6** QDVLTPSSVSGSLGQNVSIITCSGSSSNVGYANYVSWHQKQGSAPRTLIYGATSRASGVDPDFSGSKSGNTATLTISSLQPEDEADYCCSSYDSSSNI  
**IGLV8** QAVLTQPSSVSGSLGQTVIITCSGSSNNIGLGVSWYQQIPGSAPRTLIYNSNKRPSGVPDRFSGTSGKSGNTGLTIASLQAEDEADYCCASADLSLTS  
**IGLV10** QSGLTQPSSVSGNLGQTVIITCSAGTSSYVGSYNGVWYQQLPGSAPKTLIYNVSKRPSGIPDRFSGSKSGNTATLTVSGLQAEDEADYCCSSYKSGSV  
**IGLV13** QSGLTQPSSVSGNLGQTVIITCSAGTSSDVGAYNGVWYQQLPGSAPKTLIYNVSKRPSGIPDRFSGSKSGNTATLTVSGLQAEDEADYCCSSYKSGSV  
**IGLV14** SSQLTQPSSVSGSLGQTVIITCSGDDLESYAHWYQKQKPSQAPVLIYESSERPSGIPDRFSGSSSGNTATLTISSGAQTEDEADYCCQSYDSSGDP  
**IGLV15** SYELTQPTSVSVALGQTAKITCSGDLLDEQYQWYQKQKPGQGPVRIYKDSERPFGISDRFSGSSSGKATLTISSGAQTEDEADYCCQSDSSDNP  
**IGLV16** SYELTQPTSVSVALGQTAKITCSGELLEQYQWYQKQKPGQAPKLVIIYKDSKRRSGIPDRFSGSSSGKATLTISSVRAEADYCLSWDSGSYV  
**IGLV17** SSQLTQPSSVSGSLGQTVIITCSGDDLELLSAHWYQKQKPGQAPVLIYADNLSAGIPDRFSGSKSDTTATLTISSGAQTEDEADYCCQSDISGV  
**IGLV21** QPVLTPPVTVSASLGASARLSCITLSSGYNVSNYSIYWYQKAGNPLRYLLRFKSDSKHQSGVPSRFRSGSKDASTNAGLLIISGLQPEDEADYCAVWHGDTNA  
**IGLV23** QAVLTQPSSVSGSLGQRVSIITCSGSSNNIGGNYVWYQQIPGSAPKTLIYRSTSRPSGVPDRFSGSRSGNTATLTISSLQAEDEADYCATYESSSYHG  
**IGLV25** QAVLTQPSSVSGSLGQRVSIITCSGSSNNIGRYGVGWYQQVPGSGLRTIIYGSSSRPSGVPDRFSGSKSGNTATLTISSLQAEDEADYFCVAYDSSSIV  
**IGLV27** QAVLTQPSSVSGSLGQRVSIITCSGSSSNVGYVWYVWFQEPGSAPRTLIYGDTSRASGVDPDRFSGSRSGNTATLTISSLQAEDEADYFCASYQSGNT  
**IGLV28** QAVLTQPSSVSGSLGQRVSIITCSGSSSNVGTGNYVWYVWFQIPGSAPRTLIYGATSRASGVDPDRFSGSRSGNTATLTISSLQAEDEADYFCASYQSGNT  
**IGLV30** QAVLTQPSSVSGSLGQRVSIITCSGSSSNVGTGNYVWYVWFQIPGSAPRTLIYGATSRASGVDPDRFSGSRSGNTATLTISSLQAEDEADYFCASAESSSNA  
**IGLV33** QAVLTQPSSVSGSLGQRVSIITCSGSSSNVGTGNYVWYVWFQIPGSAPRTLIYGATSRASGVDPDRFSGSRSGNTATLTISSLQAEDEADYFCASYQSGNT  
**IGLV35** QAVLTQPSSVSGSLGQRVSIITCSGSSNNIGRYGVGWYQQVPGSGLRTIIYGSSSRPSGVPDRFSGSKSGNTATLTISSLQAEDEADYFCATGDYSSSTV  
**IGLV37** QAVLTQPSSVSGSLGQRVSIITCSGSSSNVGYVWYVWFQEPGSAPRTLIYGDTSRASGVDPDRFSGSRSGNTATLTISSLQAEDEADYFCASYQSGNT  
**IGLV39** QAVLTQPSSVSGSLGQRVSIITCSGSSNNIGSYGVGWYQQVPGSGLRTIIYGSSSRPSGVPDRFSGSKSGNTATLTISSLQAEDEADYFCAGDSSSSTG  
**IGLV40** QTVIQEPLSLVSPGGTVTLTCLGSSSVTTYNEPSWYRETPGQAPRNVIYNTNTPRTGVPDRFSASISGNKVTLTISSGAQPEDEADYHLLYQGSDSYG  
**IGLV43** QAVLTQPSSVSGSLGQRVSIITCSGSSSNVGYVWYVWFQIPGSAPRMLIYGATSRASGVDPDRFSGSRSGNTATLTISSLQAEDEADYFCASPDSSSSG  
**IGLV45** QAVLTQPSSVSGSLGQRVSIITCSGSSNNIGGNYVWYVWFQIPGSAPKTLIYRSTSRPSGVPDRFSGSRSGNTATLTISSLQAEDEADYCATYESSSYHG  
**IGLV46** QTVIQEPLSLVSPGGTVTLTCLGSSSVTTYNEPSWYRETPGQAPRNVIYNTNTPRTGVPDRFSASISGNKVTLTISSGAQPEDEADYHLLYQGSDSYG  
**IGLV49** QAVLTQPSSVSGSLGQRVSIITCSGSSSNVGLGNYVWYVWFQIPGSAPRTLIYGATSRASGVDPDRFSGSRSGNTATLTISSLQAEDEADYFCASPDSSSSS  
**IGLV55** QAVLTQPSSVSGSLGQRVSIITCSGSSSNVGRNYVWYVWFQIPGSAPRTLIYGATSRASGVDPDRFSGSRSGNTATLTISSLQAEDEADYFCAGDSSSSTG  
  
**Mature** QAVLTQPSSVSGSLGQRVSIITCSGSSNNIEKYNVWYVWFQIPGSAPRMLIYATNRPSPGVPDRFSGSKSGNTATLTISSLQAEDEADYFCAYDRSIKTAVCSSGTTTLVLGHRP  
**Mature** QAVVTPSSVSGSLGQRVSIITCSGNSRDVGNVWYVWFQIPGSAPRTLIYDNTNRASGVDPDRFSGSRSGNTATLTISSLQAEDEADYFCACITEDNSSAVFGSGSTLTVLGQPK  
**Mature** QAVLTQPSSVSGSLGQRVSIITCSGSSGNSIGWYVWYVWFQIPGSAPRTLIYGTSRASGVDPDRFSGSKSGNTATLTISSLQAEDEADYFCVYVDGASNCVFGSGTTLTVLGQPK

## Supplemental Figure 1

**Supplemental Table I. Germline DH Sequences of 11 Mammalian Species**

| Species | DH     | Sequence                                                                                        |
|---------|--------|-------------------------------------------------------------------------------------------------|
| Cow     | DH1-1  | E Y R D D G Y C Y T                                                                             |
| Cow     | DH1-2  | E Y R D D G Y C Y T                                                                             |
| Cow     | DH1-3  | D Y R D D G Y C Y T                                                                             |
| Cow     | DH1-4  | E Y R D D G Y C Y T                                                                             |
| Cow     | DH3-1  | Y C G S Y C G S Y Y G                                                                           |
| Cow     | DH3-3  | Y C G S Y C G S Y Y G                                                                           |
| Cow     | DH3-4  | Y C G S Y C G S Y Y G                                                                           |
| Cow     | DH4-1  | S Y S G Y G Y G Y S Y G Y                                                                       |
| Cow     | DH6-2  | S C Y S G Y G Y G C G Y G Y G Y D Y                                                             |
| Cow     | DH6-3  | S C Y S G Y G Y G Y G C G Y G Y G Y                                                             |
| Cow     | DH6-4  | S C Y S G Y G Y G Y G C G Y G Y G Y                                                             |
| Cow     | DH7-3  | S Y G G Y G Y G G Y G C Y G Y G Y G Y G Y                                                       |
| Cow     | DH7-4  | S Y G G Y G Y G G Y G C Y G Y G Y G Y G Y G Y                                                   |
| Cow     | DH8-2  | S C P D G Y S Y G Y G C G Y G Y G C S G Y D C Y G Y G G Y G G Y G G Y G Y S S Y S Y S Y T Y E Y |
| Cow     | DH9-1  | E L G G                                                                                         |
| Cow     | DH9-4  | E L G G                                                                                         |
| Human   | DH1-1  | G T T G T                                                                                       |
| Human   | DH1-7  | V L R F L E W L L Y                                                                             |
| Human   | DH1-20 | G I T G T                                                                                       |
| Human   | DH1-26 | G I V G A T                                                                                     |
| Human   | DH2-2  | G Y C S S T S C Y A                                                                             |
| Human   | DH2-8  | G Y C T N G V C Y T                                                                             |
| Human   | DH2-15 | G Y C S G G S C Y S                                                                             |
| Human   | DH2-21 | A Y C G G D C Y S                                                                               |
| Human   | DH3-3  | V L R F L E W L L Y                                                                             |
| Human   | DH3-9  | Y Y D I L T G Y Y N                                                                             |
| Human   | DH3-10 | Y Y Y G S G S Y Y N                                                                             |
| Human   | DH3-16 | Y Y D Y V W G S Y A Y T                                                                         |
| Human   | DH3-22 | Y Y Y D S S G Y Y Y                                                                             |
| Human   | DH4-4  | D Y S N Y                                                                                       |
| Human   | DH4-17 | D Y G D Y                                                                                       |
| Human   | DH5-5  | G Y S Y G Y                                                                                     |

|       |        |                   |
|-------|--------|-------------------|
| Human | DH5-12 | G Y S G Y D Y     |
| Human | DH5-18 | G Y S Y G Y       |
| Human | DH6-6  | E Y S S S S       |
| Human | DH6-13 | G Y S S S W Y     |
| Human | DH6-19 | G Y S S G W Y     |
| Human | DH6-25 | G Y S S G Y       |
| Human | DH7-27 | L T G             |
| Mouse | DH1-1  | F I T T V V A     |
| Mouse | DH1-2  | F I T T A         |
| Mouse | DH1-3  | Y I T K V V A     |
| Mouse | DH2-1  | S T M V T         |
| Mouse | DH2-2  | S T M V T         |
| Mouse | DH2-3  | S M M V T         |
| Mouse | DH2-4  | S T M I T         |
| Mouse | DH2-5  | P T I V T         |
| Mouse | DH2-6  | P T I V T         |
| Mouse | DH2-7  | S T M V T         |
| Mouse | DH2-8  | S T M V T         |
| Mouse | DH2-9  | P T M V T         |
| Mouse | DH2-10 | P T M V T         |
| Mouse | DH2-11 | P S M V T         |
| Mouse | DH2-12 | Y Y S Y Y S Y D   |
| Mouse | DH2-13 | Y Y G D Y         |
| Mouse | DH2-14 | P T I G T         |
| Mouse | DH3-1  | G T A R A         |
| Mouse | DH3-2  | R Q L G L         |
| Mouse | DH3-3  | G T A R A         |
| Mouse | DH4-1  | L T G             |
| Mouse | DH6-1  | R Q L A S A V P Q |
| Mouse | DH6-2  | R Q L V S A V P Q |
| Mouse | DH6-3  | R Q L A S A V P Q |
| Mouse | DH6-4  | R Q L A S A V P Q |
| Rat   | DH1-1  | Y Y Y S G D       |
| Rat   | DH1-2  | Y Y Y S S Y I Y   |

|        |        |                       |
|--------|--------|-----------------------|
| Rat    | DH1-3  | F N Y G S Y           |
| Rat    | DH1-4  | N Y P G I T           |
| Rat    | DH1-5  | N N I G T T           |
| Rat    | DH1-6  | F M Y T T D Y Y Y     |
| Rat    | DH1-7  | S Y Y G Y D Y         |
| Rat    | DH1-8  | F N Y S S Y           |
| Rat    | DH1-9  | T Y Y G Y N Y         |
| Rat    | DH1-10 | Y N N Y               |
| Rat    | DH1-11 | L T T E G I V         |
| Rat    | DH1-12 | Y Y Y D V V I I       |
| Rat    | DH2-1  | R Y L                 |
| Rat    | DH2-2  | G Y L                 |
| Rat    | DH2-5  | G Y L                 |
| Rat    | DH2-6  | G Y L                 |
| Rat    | DH2-7  | G Y L                 |
| Rat    | DH3-1  | P L S A P T Q         |
| Rat    | DH3-2  | P L Q C T H P         |
| Rat    | DH3-3  | P L Q C P H P         |
| Rat    | DH3-4  | P L Q C P Q P         |
| Rat    | DH3-5  | P L Q C T H S         |
| Rat    | DH3-7  | P L K C P Q P         |
| Rat    | DH4-1  | D I I R A             |
| Rat    | DH4-2  | G R I L E             |
| Rat    | DH4-3  | G I I R G             |
| Rat    | DH4-4  | G V I R G             |
| Rat    | DH4-5  | G I I R G             |
| Rat    | DH5-1  | L T G                 |
| Alpaca | DH1    | Y Y A Y W L G D A     |
| Alpaca | DH2    | T Y Y S G S Y Y Y T   |
| Alpaca | DH3    | Y Y Y C S G Y G C Y D |
| Alpaca | DH4    | Y Y S D Y D           |
| Alpaca | DH5    | R L R V G V           |
| Alpaca | DH6    | Y G S S W Y           |
| Alpaca | DH7    | E L V A P             |

|          |       |                           |
|----------|-------|---------------------------|
| Alpaca   | DH8   | L T G                     |
| Dog      | DH1   | Y Y C T D D Y C F N       |
| Dog      | DH2   | Y Y G S Y Y               |
| Dog      | DH3   | Y I Y M D                 |
| Dog      | DH4   | Y S S S W Y               |
| Dog      | DH6   | L T G                     |
| Rabbit   | DH1-1 | A Y T S S S G Y Y I       |
| Rabbit   | DH2-1 | S Y D D Y G D Y           |
| Rabbit   | DH3-2 | P M G S W F P W L W G     |
| Rabbit   | DH3-3 | P M G S L F P W L C S     |
| Rabbit   | DH4-1 | Y Y S S G W G             |
| Rabbit   | DH4-2 | Y A G S S W D             |
| Rabbit   | DH5-1 | F G E G P T H H V A M V V |
| Rabbit   | DH6-1 | V T I V M V M L M L       |
| Rabbit   | DH7-1 | Y P G Y S T G T           |
| Rabbit   | DH8-1 | Y A G S S Y Y T           |
| Sheep    | DH2   | S Y Y S G Y G Y A Y G Y   |
| Sheep    | DH3   | D M I G M A V V T V V S L |
| Pig      | DH1   | N C Y S Y G A S C Y S D   |
| Pig      | DH2   | D Y S G C Y S G Y         |
| Pig      | DH3   | A E R T A L R P Q L A     |
| Pig      | DH4   | L T G                     |
| Platypus | DH1   | Y Y Y S S G C Y D         |
| Platypus | DH2   | Y Y Y S S G C Y D         |
| Platypus | DH3   | Y S Y G S S Y Y N Y       |
| Chicken  | DH1   | G S G Y C G W G A Y       |
| Chicken  | DH2   | G S A C C G P Y           |
| Chicken  | DH4   | G R S A Y S C G A Y       |

**Supplemental Table II. Summary of the Cysteine Content in the DH Regions of 11 Mammalian Species**

| <b>Species</b> | <b>Number of Functional DH Regions</b> | <b>Total Number of Amino Acids</b> | <b>Total Number of Cysteines</b> |
|----------------|----------------------------------------|------------------------------------|----------------------------------|
| Cow            | 16                                     | 240                                | 22                               |
| Human          | 23                                     | 170                                | 8                                |
| Mouse          | 25                                     | 146                                | 0                                |
| Rat            | 29                                     | 165                                | 5                                |
| Alpaca         | 8                                      | 56                                 | 2                                |
| Dog            | 5                                      | 30                                 | 2                                |
| Rabbit         | 10                                     | 95                                 | 1                                |
| Sheep          | 2                                      | 26                                 | 0                                |
| Pig            | 4                                      | 35                                 | 3                                |
| Platypus       | 3                                      | 28                                 | 2                                |
| Chicken        | 3                                      | 28                                 | 4                                |
